# Supplementary material for: Evaluation of the Antimicrobial Activity of an Extract of Lactobacillus casei-Infected Hermetia illucens Larvae Produced Using an Automatic Injection System
Source: MDPI journal article supplement (doi:10.3390/ani10112121), 2020-11-16
Supplement: s1 [file s1]

## Evaluation of the Antimicrobial Activity of an Extract of *Lactobacillus casei*-infected *Hermetia illucens* Larvae Produced using an Automatic Injection System

Kyu-Shik Lee, Eun-Young Yun and Tae-Won Goo

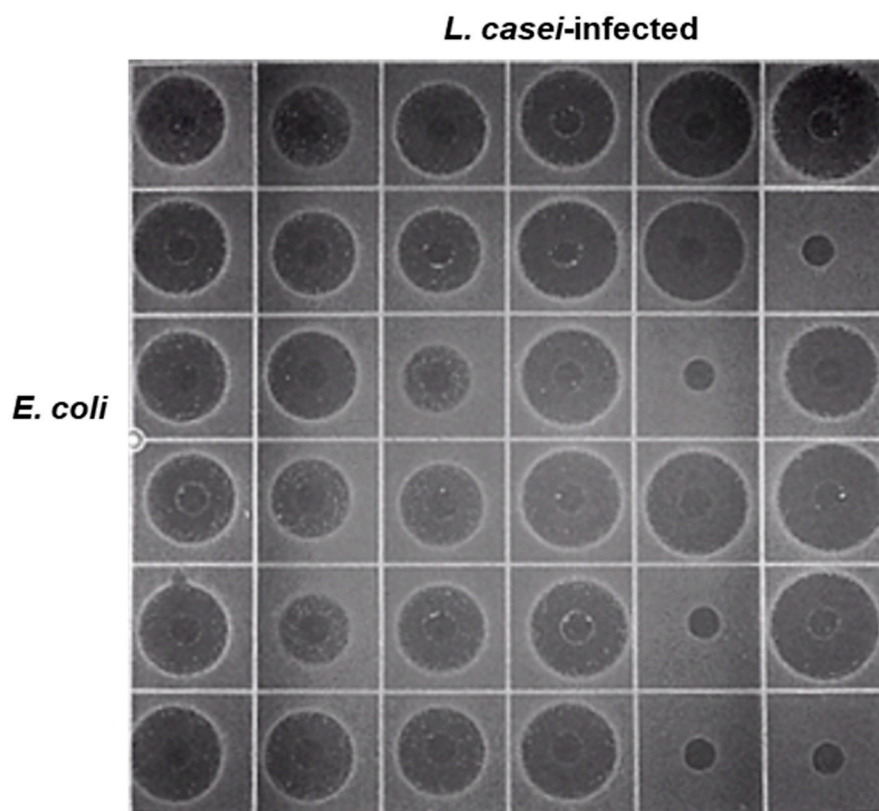

**Figure S1.** RDA results of the antimicrobial activities of iHIL-E against *E. coli*. *L. casei* were injected into HIL by manual method and held at room temperature for 24 h.

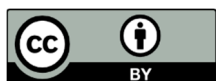

© 2020 by the authors. Licensee MDPI, Basel, Switzerland. This article is an open access article distributed under the terms and conditions of the Creative Commons Attribution (CC BY) license (<http://creativecommons.org/licenses/by/4.0/>).
